# Supplementary material for: Tailor-made thermoreversible functional polymer via RAFT polymerization in an ionic liquid: a remarkably fast polymerization process
Source: Royal Society of Chemistry journal article supplement (doi:10.1039/c6gc01677d), 2016-01-01
Supplement: c6gc01677d1.pdf [file c6gc01677d1.pdf]

## Tailor-made Thermoreversible Functional Polymer via RAFT Polymerization in an Ionic Liquid: A Remarkably Fast Polymerization Process

Nikhil K. Singha,<sup>\*,#,\dagger</sup> Nabendu B. Pramanik,<sup>#,†</sup> Prasanta K. Behera,<sup>#</sup> Arindam Chakrabarty,<sup>#</sup>  
Jimmy W. Mays<sup>\$</sup>

<sup>#</sup> Rubber Technology Centre, Indian Institute of Technology Kharagpur, Kharagpur- 721302,  
West Bengal, India

<sup>\$</sup>Department of Chemistry, University of Tennessee, 552 Buehler Hall, Knoxville, TN 37996,  
USA

### Supporting Information

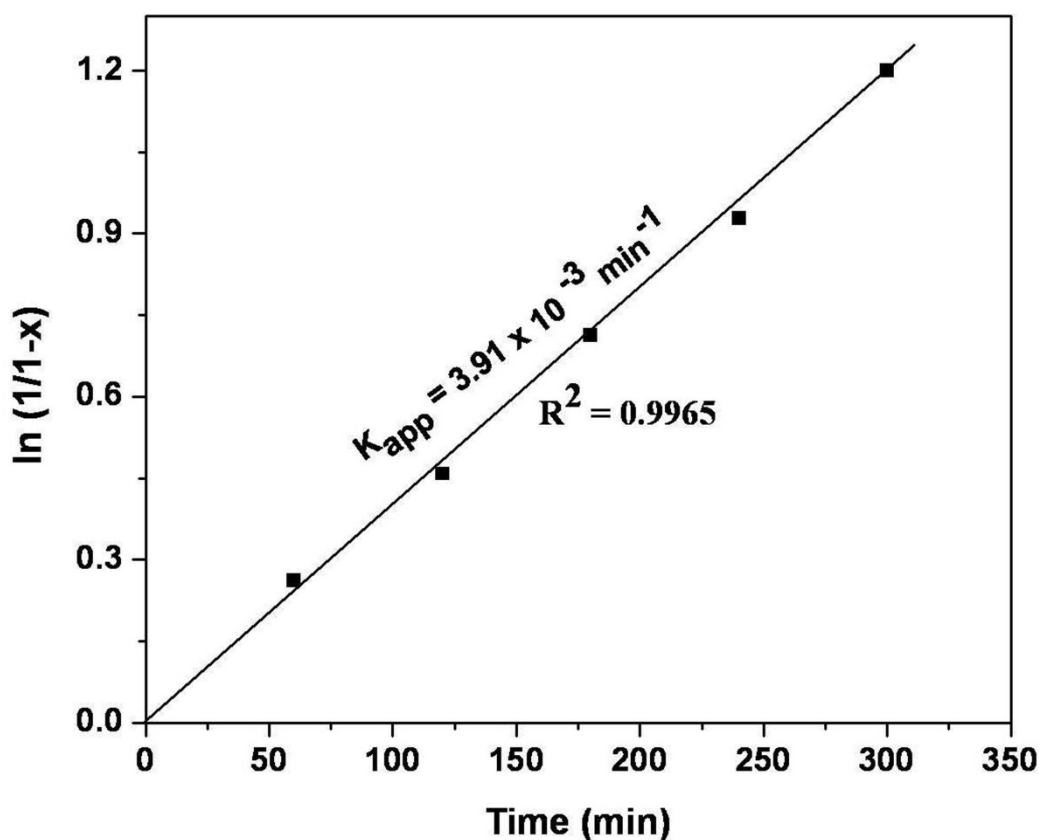

**Figure S1.** RAFT polymerization of FMA in toluene as solvent at 70 °C using CPDTC as RAFT agent.

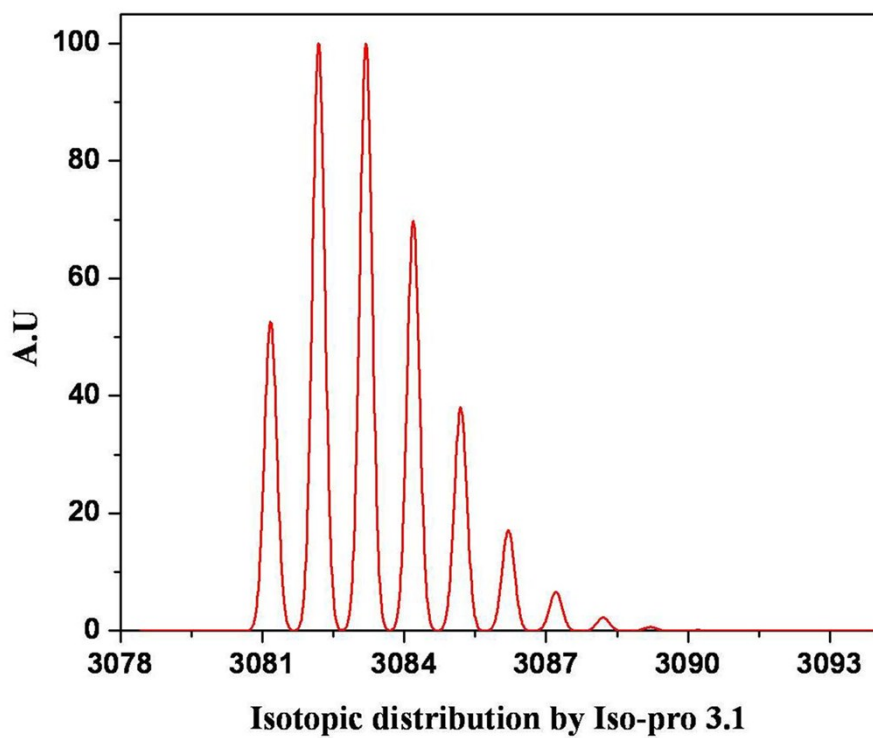

**Figure S2.** Amplified MALDI Peak at 3083 with the isotopic distribution simulated by Isopro 3.1.

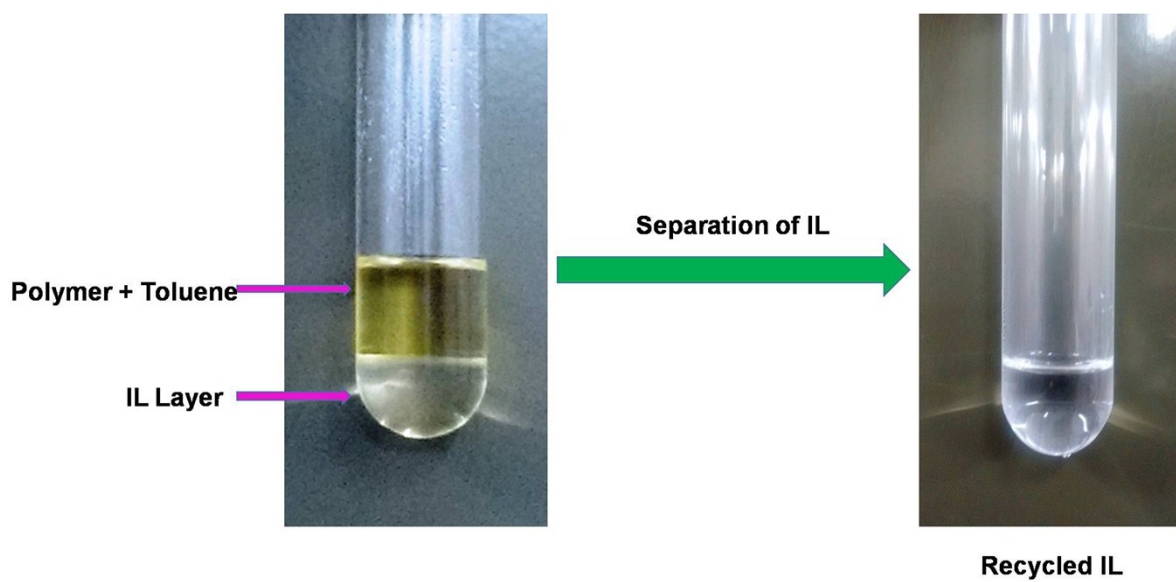

**Figure S3.** Separation of IL from the polymer mixture using toluene as solvent.

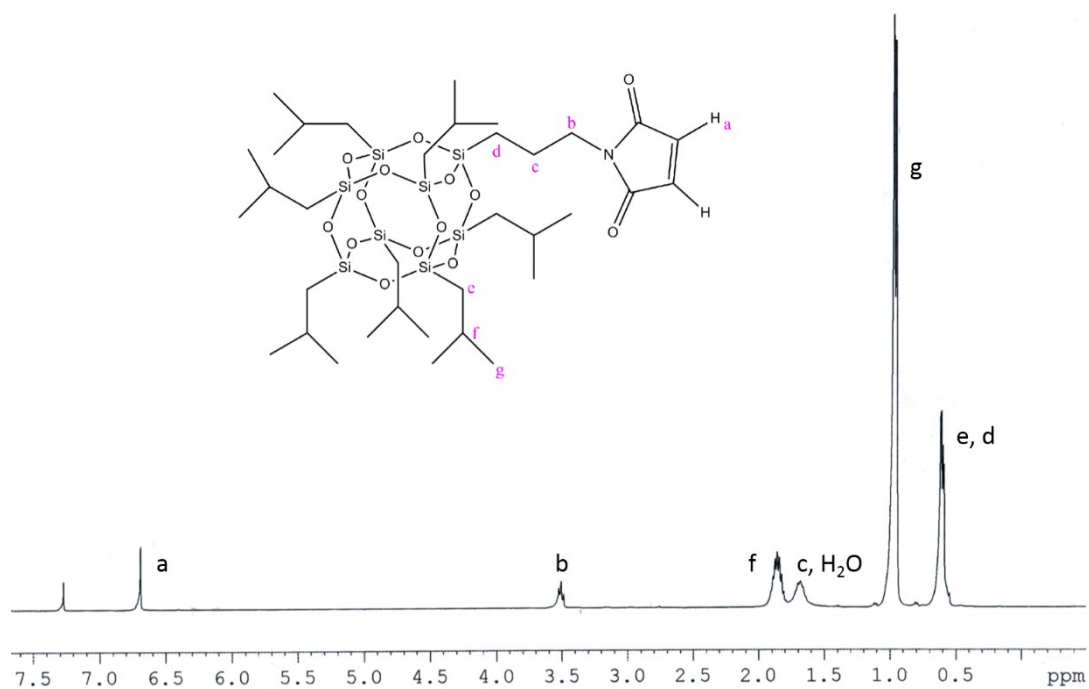

Figure S4 (a).  $^1\text{H}$ -NMR of POSS-M.

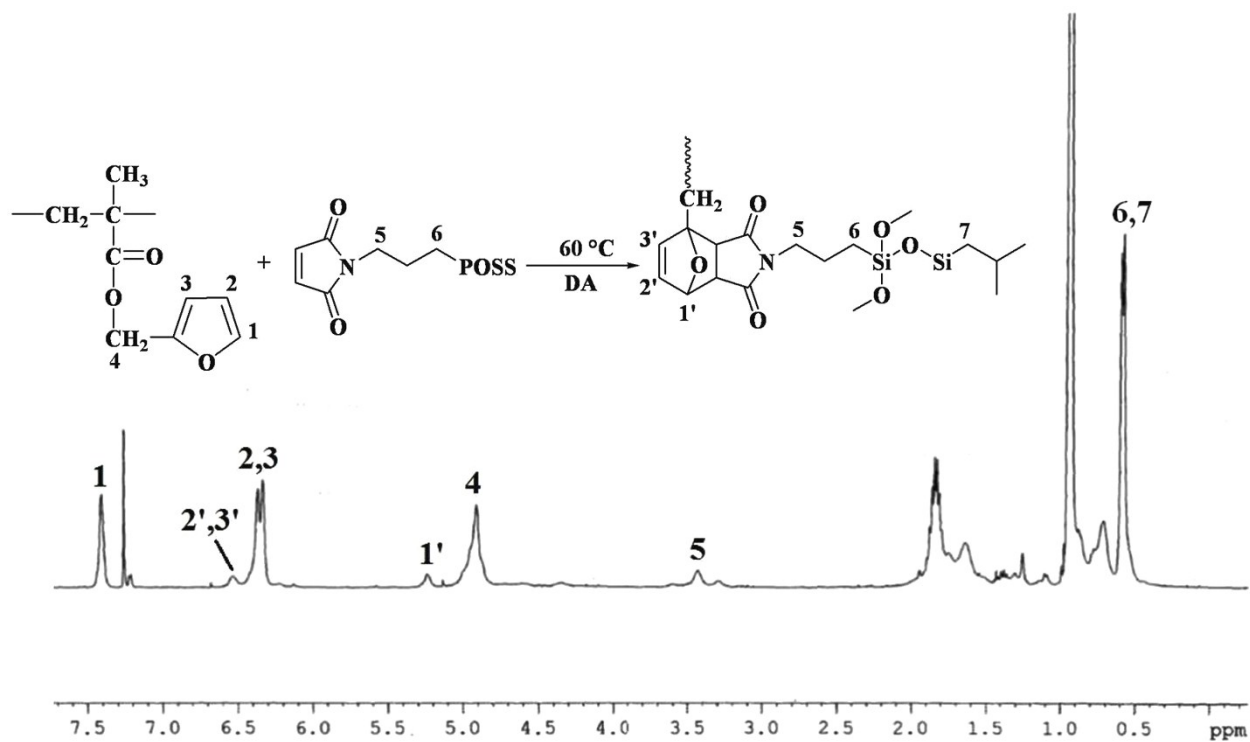

Figure S4 (b).  $^1\text{H}$ -NMR of the DA adduct between PFMA and POSS-M.
